# Supplementary material for: Quantification of regional net CO 2 flux errors in the Orbiting Carbon Observatory-2 (OCO-2) v10 model intercomparison project (MIP) ensemble using airborne measurements
Source: Copernicus journal article supplement (doi:10.5194/acp-25-1725-2025), 2025-02-06
Supplement: Supplementary file 1 [file acp-25-1725-2025-supplement.pdf]

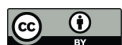

*Supplement of*

## **Quantification of regional net CO<sub>2</sub> flux errors in the Orbiting Carbon Observatory-2 (OCO-2) v10 model intercomparison project (MIP) ensemble using airborne measurements**

**Jeongmin Yun et al.**

*Correspondence to:* Jeongmin Yun ([jeongmin.yun@jpl.nasa.gov](mailto:jeongmin.yun@jpl.nasa.gov)) and Junjie Liu ([junjie.liu@jpl.nasa.gov](mailto:junjie.liu@jpl.nasa.gov))

The copyright of individual parts of the supplement might differ from the article licence.

**This PDF file includes:**

S1. Validation of representation error estimates

Tables S1

Figures S1 to S12

## S1. Validation of representation error estimates

ACT-America project provides extensive atmospheric CO<sub>2</sub> data across central and eastern North America spanning nine months for the period 2016–2019 (Baier et al., 2020; Wei et al., 2021). Using this observation data, we validate whether our representation errors, derived from simulated atmospheric CO<sub>2</sub> fields with 0.5°x0.625° resolution, reasonably represent the actual representation errors. Airborne observations do not provide simultaneous spatial distribution information of CO<sub>2</sub>, unlike models. Thus, we calculated the variances of observed CO<sub>2</sub> concentrations within each 1°x1° grid cell with a 500 m vertical interval (from 1 to 5 km) at 3-hour intervals ( $OBS\_ERR_{REP}^2$ ). On average, each grid box includes around 70 aircraft observation data. For comparison with the  $OBS\_ERR_{REP}^2$ , we sampled  $VAR_{CO_2}$ , derived from GEOS-5 results, at the corresponding aircraft measurement times and locations at each grid box and computed their mean values ( $MOD\_ERR_{REP}^2$ ). Monthly and regional mean  $OBS\_ERR_{REP}$  and  $MOD\_ERR_{REP}$  over North America show a significant positive correlation ( $r= 0.72$ ,  $p < 0.05$ ) for the ACT-America project period (Figure S1).  $MOD\_ERR_{REP}$  also has a similar mean value (0.62 [0.59, 0.64] ppm) with that of  $OBS\_ERR_{REP}$  (0.49 [0.47, 0.51] ppm). This result supports that  $ERR_{REP}$  could reasonably represent the actual mean representation error at a 1-degree grid cell.

**Table S1. Description for each OCO-2 v10 MIP inverse model. The information is from Byrne et al. (2023).**

| Simulation name  | Transport model | Meteorology forcing |                                  | Prior terrestrial CO <sub>2</sub> flux | Prior air-sea CO <sub>2</sub> flux | Inverse method         |
|------------------|-----------------|---------------------|----------------------------------|----------------------------------------|------------------------------------|------------------------|
|                  |                 | name                | resolution                       |                                        |                                    |                        |
| <b>Ames</b>      | GEOS-Chem       | MERRA-2             | 4° × 5°                          | CASA-GFED4.1s                          | CT2019OI                           | 4D-Var                 |
| <b>Baker</b>     | PCTM            | MERRA-2             | 1° × 1.25° prior,<br>4° × 5° opt | CASA-GFED3                             | Landschützer v4.4                  | 4D-Var                 |
| <b>CAMS</b>      | LM Dz           | ERA5                | 1.9° × 3.75°                     | ORCHIDEE<br>(climatological)           | CMEMS                              | Variational            |
| <b>CMS-Flux</b>  | GEOS-Chem       | MERRA-2             | 4° × 5°                          | CARDAMOM                               | MOM-6                              | 4D-Var                 |
| <b>COLA</b>      | GEOS-Chem       | MERRA-2             | 4° × 5°                          | VEGAS                                  | Rödenbeck 2021                     | EnKF                   |
| <b>CT</b>        | TM5             | ERA5                | 2° × 3°/1° × 1°                  | CT2019 CASA<br>GFED4.1s                | CT2019OI                           | EnKF                   |
| <b>OU</b>        | TM5             | ERA-Interim         | 4° × 6°                          | CASA-GFED3                             | Takahashi                          | 4D-Var                 |
| <b>TM5-4DVar</b> | TM5             | ERA-Interim         | 2° × 3°                          | SiB-CASA                               | CT2019 Opt Clim                    | 4D-Var                 |
| <b>UT</b>        | GEOS-Chem       | GEOS-FP             | 4° × 5°                          | BEPS                                   | Takahashi                          | 4D-Var                 |
| <b>WOMBAT</b>    | GEOS-Chem       | MERRA-2             | 2° × 2.5°                        | SiB-4 w/MERRA-2                        | Landschutzer 2020                  | Synthesis with<br>MCMC |

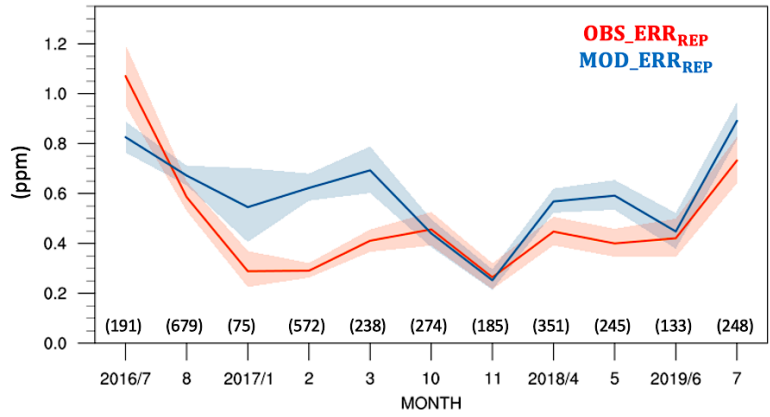

**Figure S1** Monthly variations of  $OBS\_ERR_{REP}$  and  $MOD\_ERR_{REP}$  in the central and eastern North America for ACT-America project period during 2016–2019. The lines and shaded areas represent the mean and the 95% confidence intervals derived from 1000 bootstrap samples of the 1-degree grid-based monthly error quantities. The bottom numbers indicate the number of grid data points for each month.

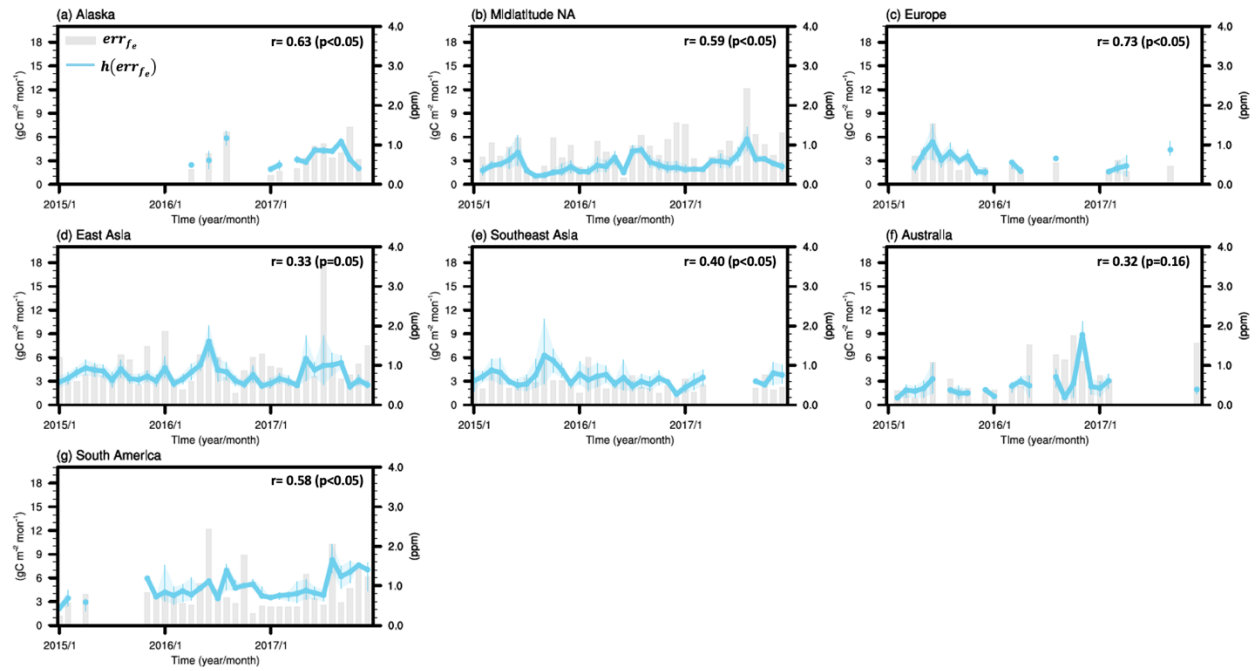

**Figure S2.** Monthly variations of  $h(err_{f_e})$  (line) and  $err_{f_e}$  (bar) for each region. The upper right number indicates the correlation coefficient between them.

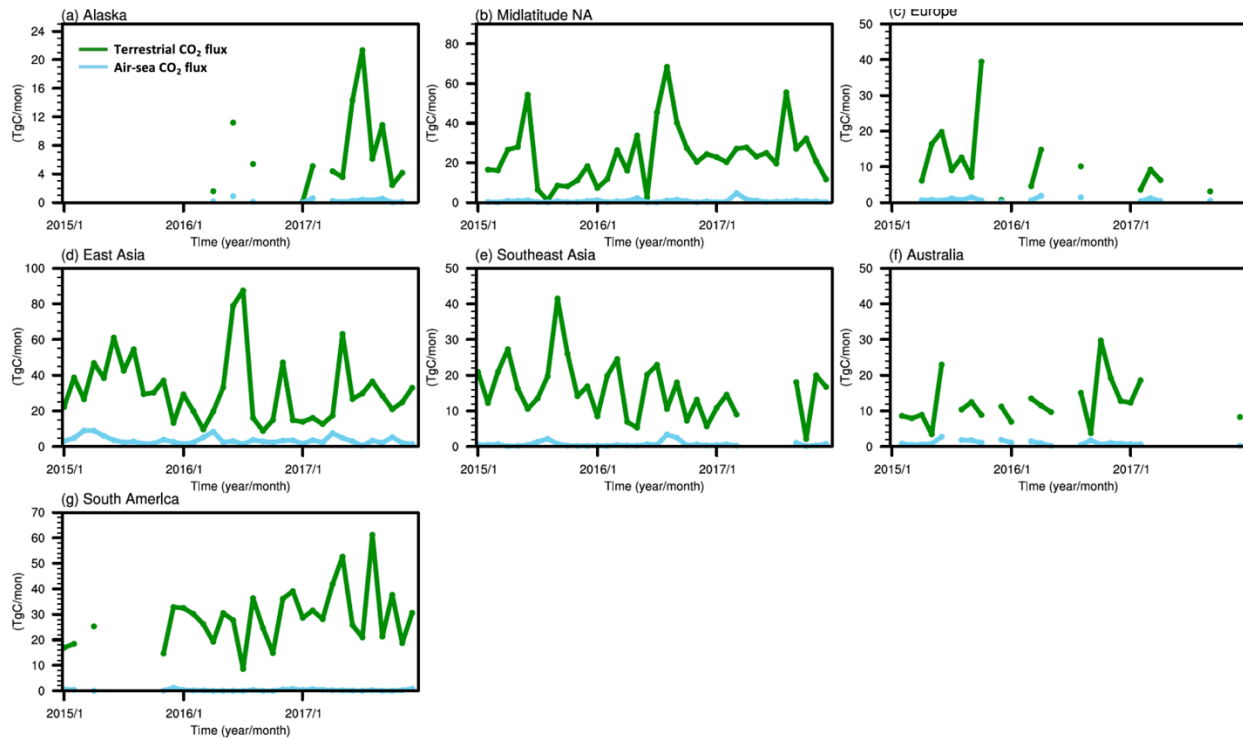

**Figure S3.** Monthly variations of one standard deviation of OCO-2 MIP inversion estimates in total land-atmosphere CO<sub>2</sub> fluxes (green line) and total ocean-atmosphere CO<sub>2</sub> fluxes (blue line) within the effective area to aircraft measurements for each region.

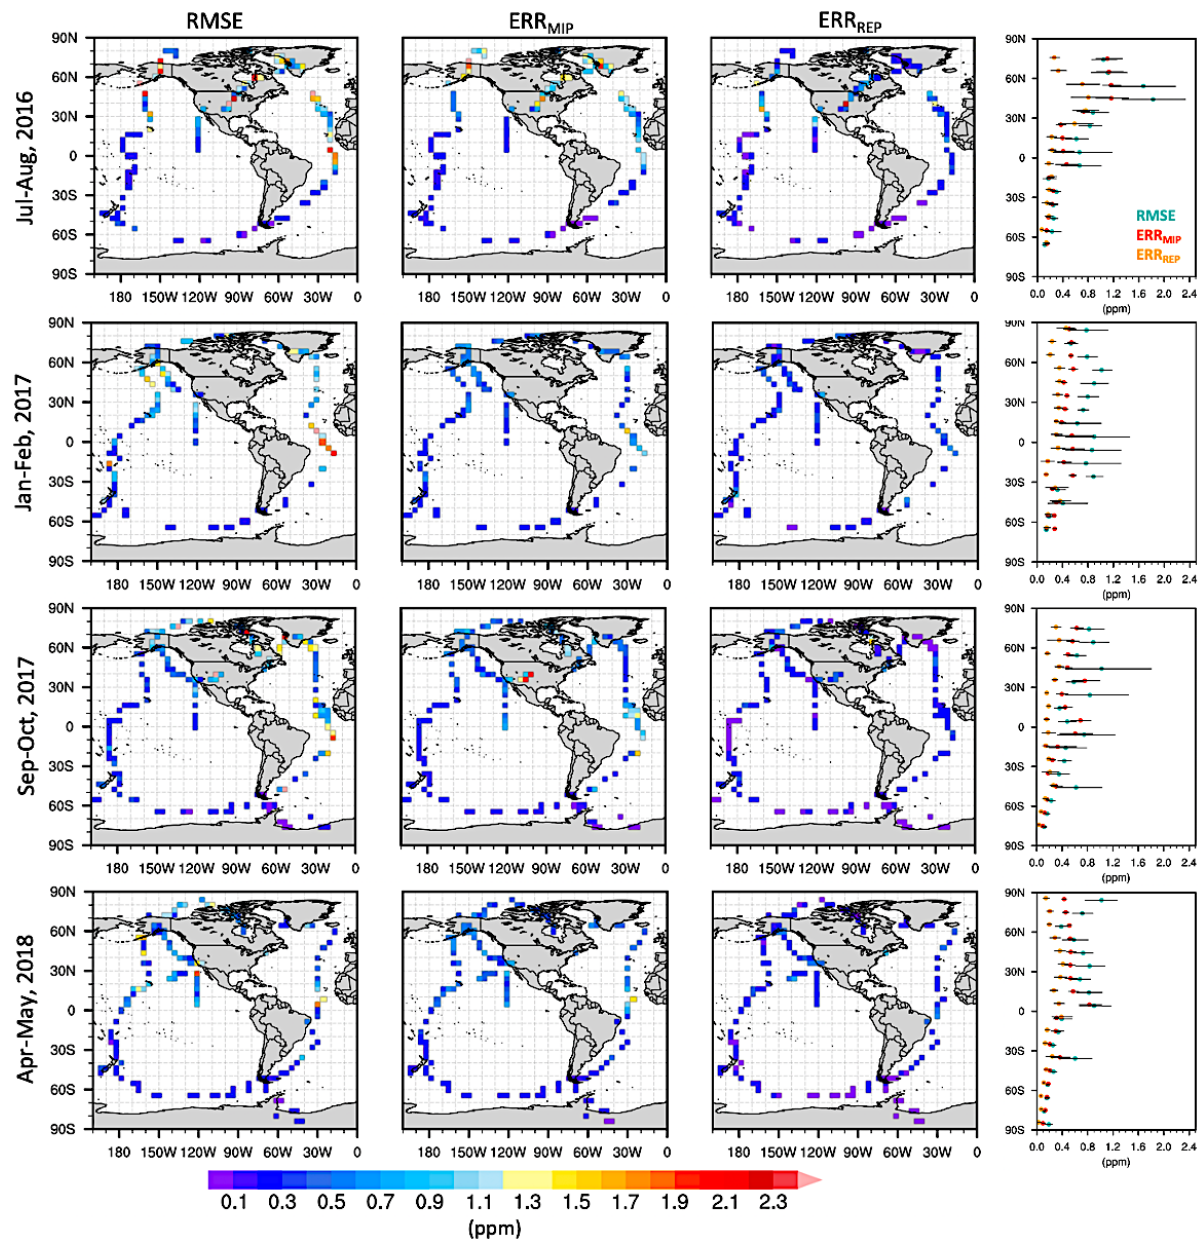

**Figure S4.** Spatial distributions of  $RMSE$ ,  $ERR_{MIP}$ , and  $ERR_{REP}$  for each ATom campaign period. Right-hand panels show their latitudinal distributions smoothed by  $10^\circ$  moving average (dot) with 95% confidence intervals derived from 1000 bootstrap samples of datasets (error bar).



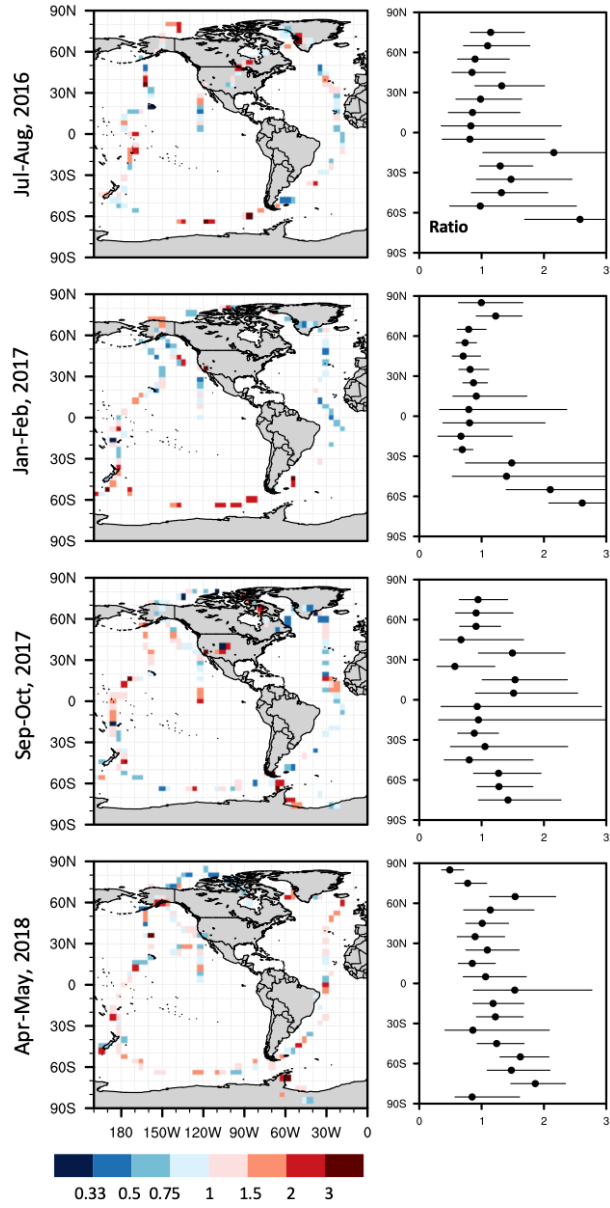

Figure S5. Same as Figure S4 but for Ratio.

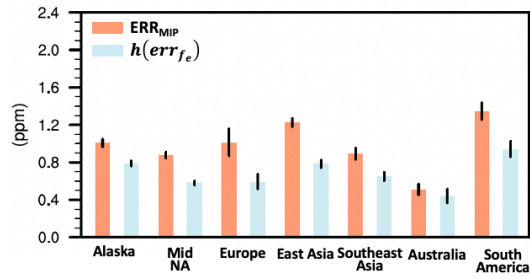

**Figure S6.** Regional mean values of  $ERR_{MIP}$  and  $h(err_{f_e})$  for the period 2015–2017. The error bars represent the 95% confidence intervals derived from 1000 bootstrap samples of datasets.

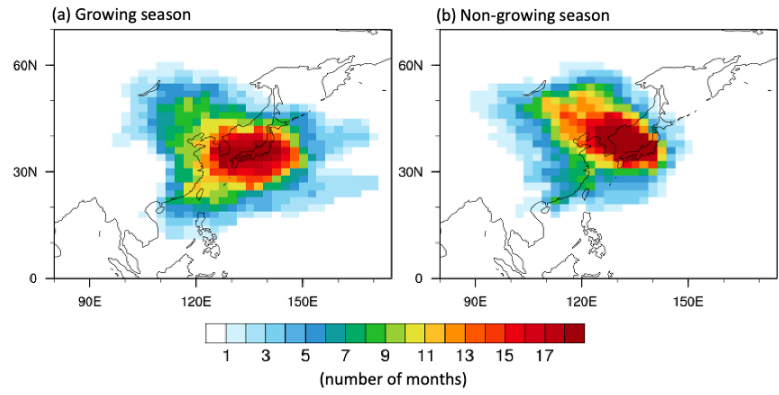

**Figure S7.** Number of months selected as the effective area for airborne measurements in East Asia during (a) the vegetation growing season and (b) the non-growing season for the period 2015–2017.

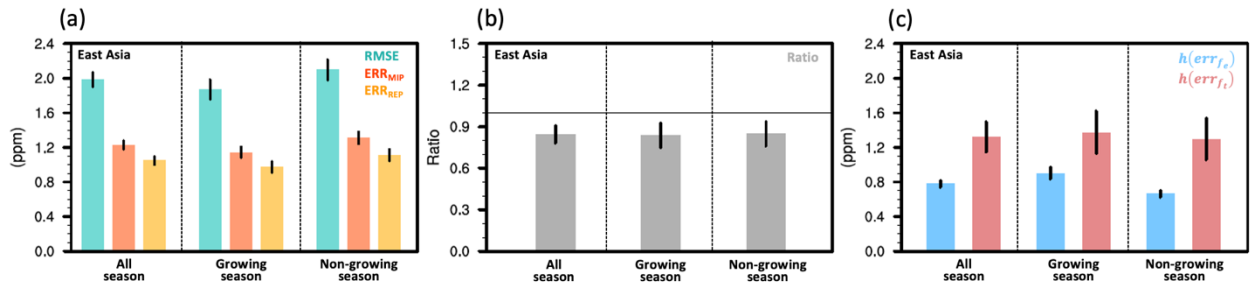

**Figure S8.** Mean values of monthly (a)  $RMSE$ ,  $ERR_{MIP}$ ,  $ERR_{REP}$ , (b)  $Ratio$ , (c)  $h(err_{f_e})$ , and  $h(err_{f_t})$  in East Asia for each season for the period 2015–2017. The error bars represent the 95% confidence intervals derived from 1000 bootstrap samples of datasets.

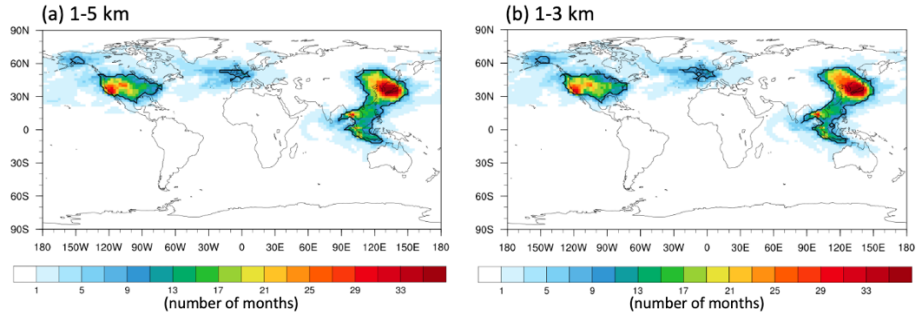

**Figure S9.** Number of months selected as the effective area for airborne measurements made within (a) the 1-5 km a.g.l. altitude range and (b) 1-3 km a.g.l. altitude range in Alaska, mid-latitude North America, Europe, East Asia, and Southeast Asia for the period 2015–2017. The outlined area represents selected areas for more than eight months or equal.

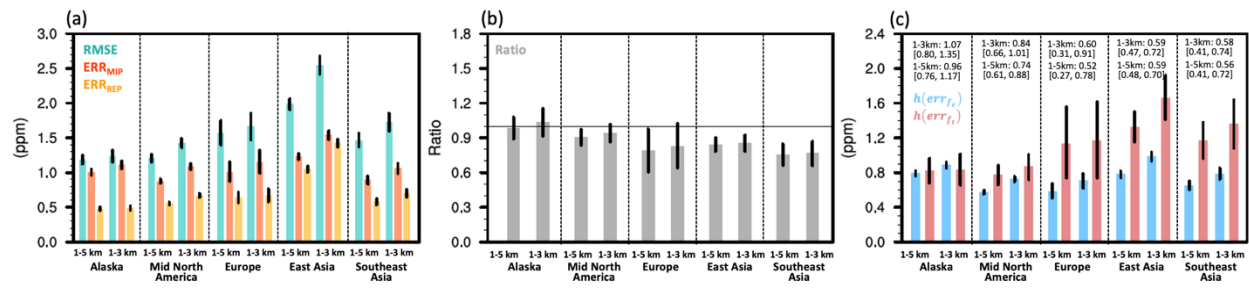

**Figure S10.** Mean values of monthly (a)  $RMSE$ ,  $ERR_{MIP}$ ,  $ERR_{REP}$ , (b)  $Ratio$ , (c)  $h(err_{f_e})$ , and  $h(err_{f_t})$  derived from atmospheric CO<sub>2</sub> data within either the 1-5 km or 1-3 km a.g.l. altitude range for each region for the period 2015–2017. The numbers at the top of panel (c) indicate the ratio of the three-year mean  $h(err_{f_e})$  to  $h(err_{f_t})$ . The error bars and error ranges represent the 95% confidence intervals derived from 1000 bootstrap samples of datasets.

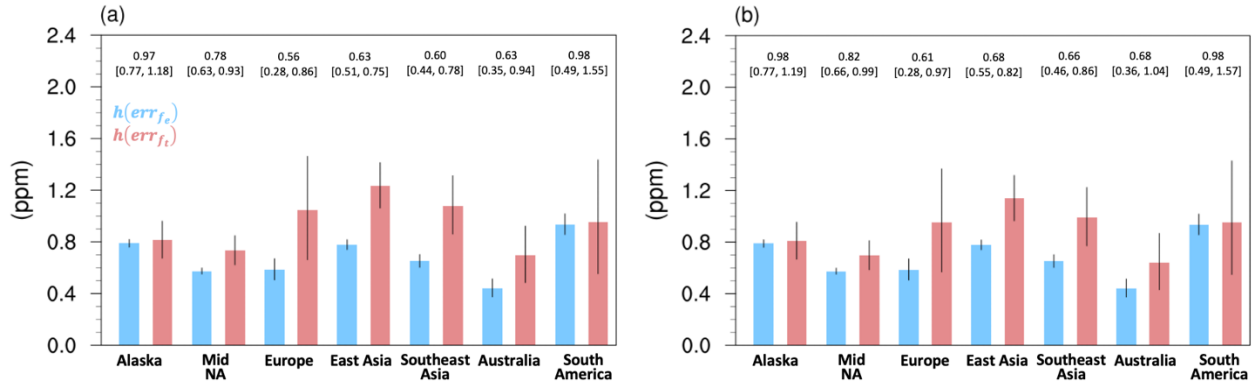

**Figure S11.** Mean values of monthly  $h(err_{f_e})$ , and  $h(err_{f_t})$  for each region for the period 2015–2017 where (a)  $h(err_{f_t})^2 - h(err_{f_e})^2 = 0.8 \cdot (RMSE^2 - ERR_{TOT}^2)$  and (b)  $h(err_{f_t})^2 - h(err_{f_e})^2 = 0.6 \cdot (RMSE^2 - ERR_{TOT}^2)$ . The numbers at the top of each panel indicate the ratio of the three-year mean  $h(err_{f_e})$  to  $h(err_{f_t})$ . The error bars and error ranges represent the 95% confidence intervals derived from 1000 bootstrap samples of datasets.

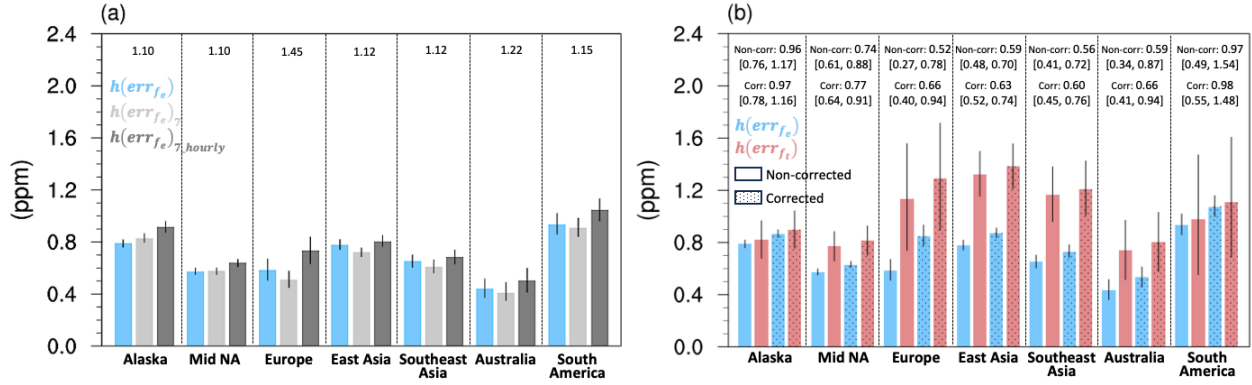

**Figure S12. (a)** Mean values of monthly  $h(err_{f_e})$  for each region for the period 2015–2017, derived using different monthly posterior flux estimates from either 10 (blue) or 7 ( $h(err_{f_e})_{7}$ ; light gray) OCO-2 MIP models with identical hourly NBE variation information, or from different monthly posterior flux estimates from 7 models with different hourly NBE variation information ( $h(err_{f_e})_{7\_hourly}$ ; dark gray). The numbers at the top of the panel (a) indicate the ratio of  $h(err_{f_e})_{7\_hourly}$  to  $h(err_{f_e})_{7}$ . **(b)** Mean monthly values of  $h(err_{f_e})$  (blue) and  $h(err_{f_t})$  (red) for each region over three years, with the dotted bars representing the corrected  $h(err_{f_e})$ , obtained by multiplying the ratio of  $h(err_{f_e})_{7\_hourly}$  to  $h(err_{f_e})_{7}$ , and the recalculated  $h(err_{f_t})$  using these corrected  $h(err_{f_e})$  values. The numbers at the top of the panel (b) denote the ratio of  $h(err_{f_e})$  to  $h(err_{f_t})$ . The error bars represent the 95% confidence intervals derived from 1000 bootstrap samples of datasets.
